# Supplementary material for: Gas phase electronic structure of the DTDCTB small-molecule donor for vacuum-processed organic photovoltaics compared to its constituent building blocks
Source: Royal Society of Chemistry journal article supplement (doi:10.1039/d4ma00515e), 2024-01-01
Supplement: d4ma00515e1.pdf [file d4ma00515e1.pdf]

## **Gas Phase Electronic Structure of the DTDCTB Small-Molecule Donor for Vacuum-Processed Organic Photovoltaics Compared to Its Constituent Building Blocks**

Ambra Guarnaccio<sup>1\*</sup>, Iulia Emilia Brumboiu<sup>2\*</sup>, Cesare Grazioli<sup>3</sup>, Teng Zhang<sup>4</sup>, Fredrik O. L. Johansson<sup>5</sup>, Marcello Coreno<sup>6</sup>, Monica de Simone<sup>3</sup>, Carla Puglia<sup>5</sup>

<sup>1</sup> *CNR - Istituto di Struttura della Materia (ISM), Tito Scalo Branch, C/da S. Loja - 85050 Tito Scalo (Pz) - POTENZA – Italy*

<sup>2</sup> *Faculty of Physics, Astronomy and Informatics, Nicolaus Copernicus University, 87-100 Toruń, Poland*

<sup>3</sup> *CNR - Istituto Officina dei Materiali (IOM), 34149 Trieste, Italy*

<sup>4</sup> *School of Integrated Circuits and Electronics, and Yangtze Delta Region Academy, Beijing Institute of Technology, 100081 Beijing, People's Republic of China*

<sup>5</sup> *Program for Condensed Matter Physics of Energy Materials, Department of Physics and Astronomy, Uppsala University, Box 516, SE-751 20 Uppsala, Sweden*

<sup>6</sup> *CNR - Istituto di Struttura della Materia (ISM), Trieste Branch, in Basovizza Area Science Park, 34149 Trieste, Italy*

\* Corresponding author's e-mails:

[ambra.guarnaccio@cnr.it](mailto:ambra.guarnaccio@cnr.it)

[iubr@umk.pl](mailto:iubr@umk.pl)

## C 1s ionization energies for $\alpha$ , $\beta$ , $\gamma$ carbons in the BTD building block molecule

The origin of the different C1s ionization energies of the  $C_\alpha$ ,  $C_\beta$ , and  $C_\gamma$  atoms of the BTD molecule, are due to their chemically inequivalence, *i.e.*, the different chemical environment that these Carbon atoms experience. Figure S1(a) provides the calculated C 1s XPS spectrum for the BTD building block molecule. The core binding energies (BEs) were calculated as the total energy difference between the molecule with a full core hole (FCH) on a specific C atom and the ground state (GS) molecule in a  $\Delta$ Kohn-Sham approach. The GS and FCH energies were calculated using the StoBe software package and the same functional and basis sets as described in the Computational Details section of the manuscript. The BE for  $C_\alpha$  is calculated at 290.73 eV, while the BEs for  $C_\beta$ , and  $C_\gamma$  are quite close to each other and are calculated at about 289.69 eV and 289.65 eV, respectively. The energy shift between the  $C_\alpha$  and  $C_\beta$ ,  $C_\gamma$  1s BEs (XPS peaks) is equal to 1.05 eV and is very similar to the shift between the experimental NEXAFS peaks A ( $C_\beta$ , and  $C_\gamma$ ) and B ( $C_\alpha$ ) of BTD that is about 0.91 eV (Figure S1(b)). The C1s XPS of DPTA (Figure S2) and DTDCTB (Figure S3) are provided for completeness.

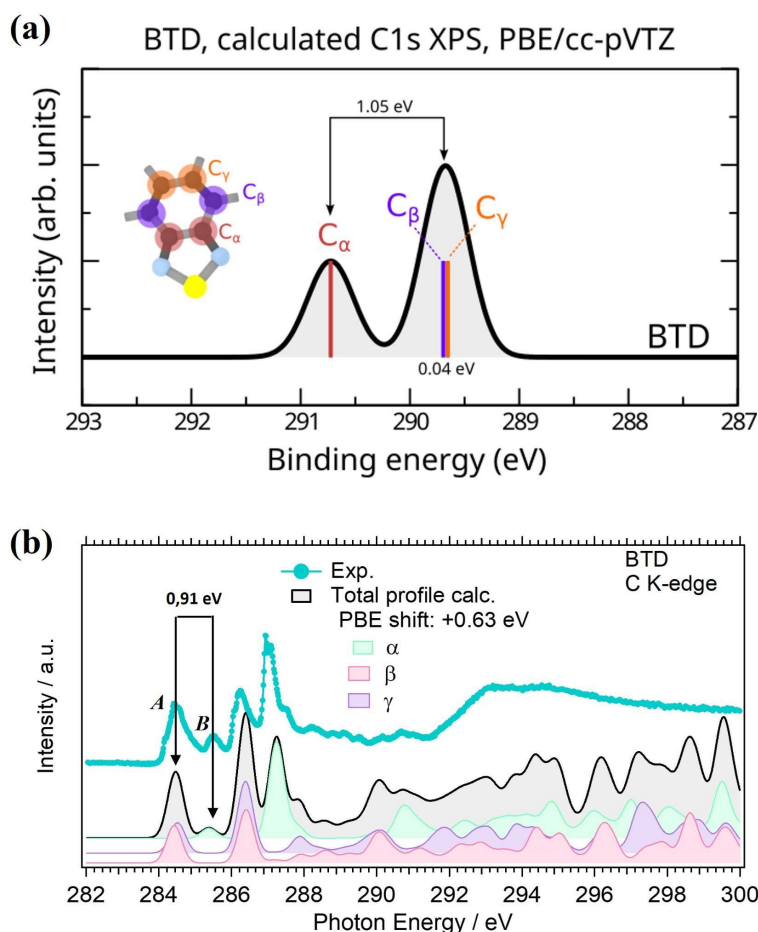

**Figure S1:** (a) Calculated (PBE/cc-pVTZ) C 1s XPS spectrum and (b) experimental C K-edge NEXAFS of BTD building block molecule.

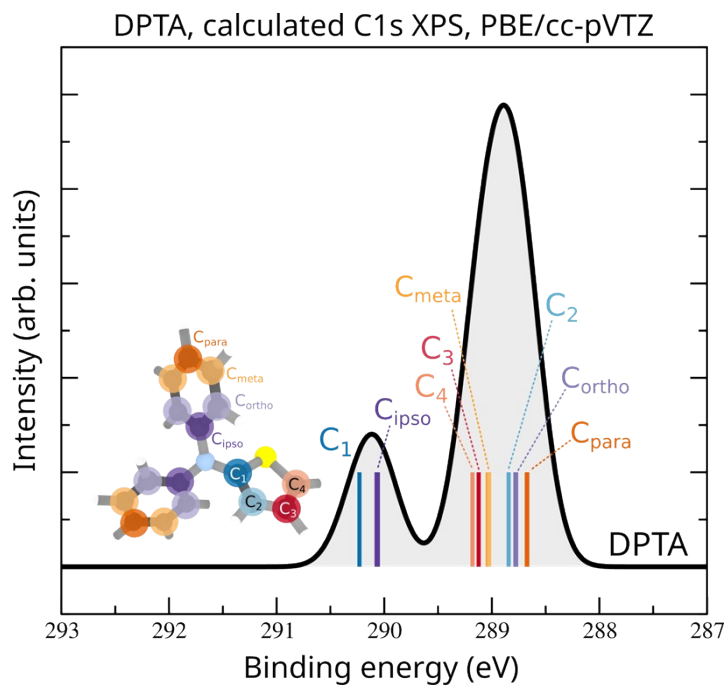

**Figure S2:** Calculated C 1s XPS spectrum of DPTA.

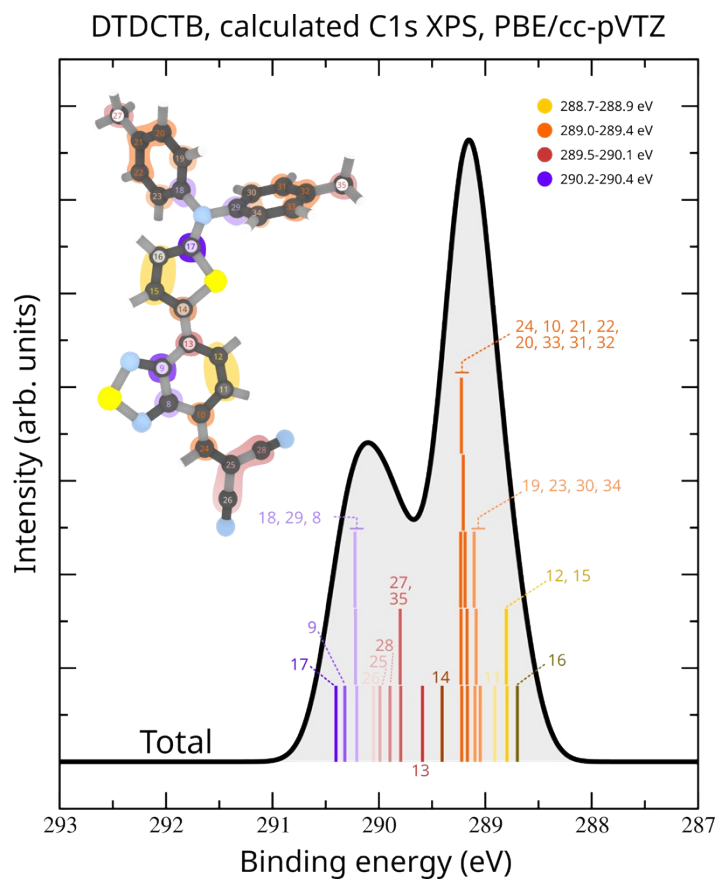

**Figure S3:** Calculated C 1s XPS spectrum of DTDCTB.
